# Supplementary material
Source: PubMed Central journal article supplement (PMC3105762)
Supplement: ismej2010180x4.pdf [file ismej2010180x4.pdf]

## Supplementary Material

### Supplementary materials and methods

#### Algorithm

##### Input data variants: Raw oligonucleotide frequencies and z-scores

All input DNA sequences were extended by their reverse complements in order to compensate for asymmetries between leading and lagging strand oligonucleotide compositions. For training TaxSOM, either raw oligonucleotide frequencies or Markov model-derived z-scores were used as input data. In the case of raw frequencies, all possible oligonucleotides of a given length were counted and the counts subsequently normalized on sequence length. When z-scores were used as input data, the normalized raw counts were z-transformed (Teeling et al., 2004). A z-transformation is the normalization of the differences between the observed and expected counts on the standard deviation (Eqn: 1). For example, if the observed frequency  $N$  of an oligonucleotide of length four (tetranucleotide) within a sequence is denoted as  $N(n_1n_2n_3n_4)$ , the corresponding expected frequency is denoted as  $E(n_1n_2n_3n_4)$  and the variance as  $var(N(n_1n_2n_3n_4))$ , then the corresponding z-score  $Z(n_1n_2n_3n_4)$  is calculated as follows:

$$Z(n_1n_2n_3n_4) = \frac{N(n_1n_2n_3n_4) - E(n_1n_2n_3n_4)}{\sqrt{var(N(n_1n_2n_3n_4))}} \quad (\text{Eqn. 1})$$

The expected frequency within Eqn. 1 can be computed via the maximal-order Markov model given in Eqn. 2, and the variance via the Markov-model approach in Eqn. 3 (Schbath et al., 1995).

$$E(n_1n_2n_3n_4) = \frac{N(n_1n_2n_3) * N(n_2n_3n_4)}{N(n_2n_3)} \quad (\text{Eqn. 2})$$

$$var(N(n_1n_2n_3n_4)) = E(n_1n_2n_3n_4) * \frac{[N(n_2n_3) - N(n_1n_2n_3)] * [N(n_2n_3) - N(n_2n_3n_4)]}{N(n_2n_3)^2} \quad (\text{Eqn. 3})$$

Irrespective of whether raw counts or z-scores were used as inputs, in both cases input DNA sequences were transformed into numerical vectors (one for each DNA sequence), with a size determined by the number of possible oligonucleotide permutations. For a given oligonucleotide length  $n$ , the number of possible permutations is  $4^n$  ( $3 = 64$ ;  $4 = 256$ ;  $5 = 1024$ ; etc.).

### **SOM algorithm variants: Growing and batch-learning Self-Organizing Maps**

TaxSOM implements two variants of the SOM algorithm, the batch-learning and the growing SOM. TaxSOM's batch-learning implementation is a variation of the one described by Abe (Abe et al., 2003), while the growing SOM implementation follows the approach described by Chan (Chan et al., 2007).

#### **Batch-learning SOMs (BLSOMs)**

In the batch-learning approach, all input vectors are presented to the SOM at once. Hence, the batch-learning SOM is independent of the temporal order of the input vectors. This has the advantage that SOMs can be initialized with pre-ordered input data instead of random input data, which causes the algorithm's iterative phases to need fewer cycles for convergence (Kohonen et al., 2001). In our case, a Principal Components Analysis (PCA) was applied to the input vectors prior to SOM initialization. PCA transforms the data to a new coordinate system in a way that the highest variance is represented by the first coordinate (first principal component, PC1), the second highest variance on the second coordinate (second principal component, PC2), etc.. This is achieved by rotating the vector space with the eigenvectors (the principal components) of the covariance matrix as a new basis. The subsequent batch-learning SOM algorithm works as follows:

#### **Step 1: Initialization**

The first step in the initialization of a batch-learning SOM is to determine its lattice size, i.e. the number of nodes in both dimensions that are required to represent the variation of the input data. These numbers can be estimated from the standard deviations of the first two principal components of the input data (Abe et al., 2003). The number of nodes in the first dimension ( $i$ ) was set to five times the spread of the standard deviation of PC1 ( $5\sigma_1$ ), and for the second dimension ( $j$ ) it was approximated as the nearest integer exceeding  $\sigma_2/\sigma_1 \times I$ . After determining the SOM's lattice dimensions, all nodes were initialized with numerical data. These initial weight vectors were computed as follows:

$$w_{ij} = x_{av} + \left[ b_1 \left( i - \frac{I}{2} \right) + b_2 \left( j - \frac{J}{2} \right) \right] \quad (\text{Eqn. 4})$$

In Eqn. 4,  $w_{ij}$  denotes the weights of the node at position  $ij$ ,  $x_{av}$  denotes the average of all vectors of the input data, and  $b_1$  and  $b_2$  denote the eigenvectors of the first and second principal components.

### Step 2: Iterative association

For each input vector, the node with the minimum distance was determined, i.e. the node with the weight vector  $w_{ij'}$  most similar to the input vector  $x_k$ . In TaxSOM, the Euclidean distance is used for this purpose, but in principle other distance measures can be used as well.

### Step 3: Iterative learning

After all input vectors have been associated with nodes, the learning phase starts, where the node's weight vectors  $w_{ij'}$  are iteratively adjusted to better reflect the input data. These adjustments were made in the following way:

$$w_{ij(\text{new})} = w_{ij} + \alpha(r) \left( \frac{\sum_{x_k \in S_{ij}} x_k - w_{ij}}{N_{ij}} \right) \quad (\text{Eqn: 5})$$

The factor  $\alpha$  denotes the learning rate. It decreases during the algorithm's iterations  $r$  according to  $\alpha(r) = \max\{0.01, \alpha(1)(1 - r/T)\}$ , where  $T$  is the start value of  $\alpha$ . Elements of  $S_{ij}$  are all input vectors  $x_k$  associated with the node  $w_{ij'}$  plus those in its neighborhood. The neighborhood is defined as the area around  $w_{ij'}$  satisfying the conditions  $i - \beta(r) \leq i' \leq i + \beta(r)$  and  $j - \beta(r) \leq j' \leq j + \beta(r)$ . The parameter  $\beta$  determines the size of the neighborhood and decreases over iterations according to  $\beta(r) = \max\{0, \beta(1) - r\}$ .  $N_{ij}$  represents the number of elements in  $S_{ij}$ .

### Growing SOMs (GSOMs)

In the batch-learning SOM algorithm the lattice size has to be estimated from the level of variation within the input data. This can lead to non-optimal map sizes, which affects the

separation quality of the data. The growing Self-Organizing Map algorithm addresses this issue. It starts out with only a small number of nodes but more nodes are iteratively added when this is needed to better reflect the variation of the input data (Alahakoon et al., 2000). The growth of the map is controlled by the Growth Threshold (GT) parameter that is defined as  $GT = -D \times \ln(SF)$ . D is the dimensionality of the input data and SF is a user-defined spread factor with a value ranging between 0 and 1. A SF of zero causes minimal growth, while a SF of one causes maximal growth. The GSOM algorithm consists of three phases, the initialization phase, the growing phase and the smoothing phase. During growth, for each input vector the node with the minimal Euclidean distance is found (winning node). Since this distance represents the precision with which an input data vector is represented by the map, it can be interpreted as an error value. Within the iterations of a GSOM, this value is accumulated every time the same node wins according to:

$$E_{winner}(t+1) = E_i(t) + \sqrt{\sum_{k=1}^{Dim} (v_k - w_{winner, k})^2} \quad (\text{Eqn\_6})$$

If the winning node's position is at the boundary of the lattice and its error value exceeds GT, than this node grows new nodes at every possible free position around it. The new nodes are initialized with weight vectors that are similar to the weights of their neighboring nodes, so that they integrate well in the map (Alahakoon et al., 2000). If the winning node's position is not at the boundary of the lattice and its error exceeds GT, this node's error is distributed to the surrounding nodes. This provides non-boundary nodes with the ability to indirectly initiate node growth. The GSOM algorithm works as follows:

### **Step 1: Initialization**

The weight vectors of the starting nodes are initialized with random values. Depending on whether a rectangular or a hexagonal topology is used, the initial lattice consists of four or seven nodes, respectively. The final size of the GSOM is controlled by the growth factor that is a function of the spread factor and the dimensionality of the input data.

### **Step 2: Growing**

An element of the dataset is presented to the network. By calculating the Euclidean distances between the presented input vector and all nodes' weight vectors, the node containing a weight vector with minimal distance is determined; this node is considered

as the winner. Subsequently, the weight vectors of the winning node and those inside its neighborhood are adapted, and the error value of the winning node is increased. When the error of a node exceeds the growth threshold (GT) and it is a boundary node, new nodes are grown at every free position around it. If a non-boundary node reaches GT, the error is distributed to neighboring nodes. In case of growth, the new nodes' weight vectors are initialized to match the neighboring nodes weights. Finally, the learning rate (LR) is reset to its initial value. All steps described above are repeated until all elements of the dataset have been presented to the network and node growth is only minimal.

### **Step 3: Smoothing**

In the smoothing phase, the learning rate (LR) is lowered and the starting neighborhood is set to a small size. Again, input data is presented to the network and winning nodes are updated the same way as in growing phase.

## Supplementary figure legends

### Suppl. Figure 1

Supplement to Figure 2: F-measure values for the GSOM-based classification of the simulated metagenome datasets mimicking habitats of varying complexities that were assembled with the two programs PHRAP and Arachne, respectively. (a) F-values for contigs of 8 kb or larger from the low (simLC) and medium (simMC) complexity datasets, and (b) F-values for all datasets including the high complexity dataset (simHC) without constraints in contig length. Different taxonomic levels are shown in different colors.

### Suppl. Figure 2

BLSOM-based classification statistics of simulated datasets

Taxonomic classification accuracy of TaxSOM for the simulated metagenome datasets mimicking habitats of varying complexities that were assembled with the two programs PHRAP and Arachne, respectively. (a) Values for contigs of 8 kb or larger from the low (simLC) and medium (simMC) complexity datasets, and (b) values for all datasets including the high complexity dataset (simHC) without constraints in contig length. Different taxonomic levels are shown in different colors. All classifications were performed on a BLSOM trained with z-transformed tetranucleotide counts.

### Suppl. Figure 3

Cross-evaluation of TaxSOM with the protein-based taxonomic classification tools (CARMA and Darkhorse) for the MIMAS metagenome dataset of April 14<sup>th</sup>. Both tools were applied to only those contigs  $\geq 2.5$  kb where both tools provided classification results (1 896 contigs in total).

## Supplementary tables

### Suppl. Table 1a

Classification statistics for known organisms with raw count-based GSOMs (classification specificities [%] - *sp.*, sensitivities [%] - *sn.* and F-measure values [%] - *fm.*) of leave-out-datasets with randomly selected parts of fully sequenced microbial species). Statistics for fragments of 0.5 kb to 50 kb sizes and motif lengths from di- to tetranucleotides are shown. Fragments were classified on GSOMs trained with oligonucleotide raw counts. Dinucleotide GSOMs were trained using DNA-sequences split into 10 kb fragments, while tri-, and tetranucleotide GSOMs were trained with 50 kb fragments.

| Size                       | Superkingdom |            |            | Phylum     |            |            | Class      |            |            | Order      |            |            | Family     |            |            | Genus      |            |            | Species    |            |            |
|----------------------------|--------------|------------|------------|------------|------------|------------|------------|------------|------------|------------|------------|------------|------------|------------|------------|------------|------------|------------|------------|------------|------------|
|                            | <i>sp.</i>   | <i>sn.</i> | <i>fm.</i> | <i>sp.</i> | <i>sn.</i> | <i>fm.</i> | <i>sp.</i> | <i>sn.</i> | <i>fm.</i> | <i>sp.</i> | <i>sn.</i> | <i>fm.</i> | <i>sp.</i> | <i>sn.</i> | <i>fm.</i> | <i>sp.</i> | <i>sn.</i> | <i>fm.</i> | <i>sp.</i> | <i>sn.</i> | <i>fm.</i> |
| Tetranucleotide raw counts |              |            |            |            |            |            |            |            |            |            |            |            |            |            |            |            |            |            |            |            |            |
| 0.5 kb                     | 95           | 98         | 97         | 61         | 85         | 71         | 44         | 74         | 55         | 32         | 58         | 41         | 25         | 48         | 33         | 19         | 31         | 23         | 6          | 5          | 5          |
| 1.0 kb                     | 97           | 98         | 97         | 72         | 86         | 78         | 59         | 77         | 67         | 49         | 65         | 56         | 42         | 56         | 48         | 33         | 39         | 36         | 12         | 8          | 10         |
| 2.5 kb                     | 98           | 98         | 98         | 86         | 89         | 87         | 79         | 83         | 81         | 74         | 74         | 74         | 68         | 67         | 68         | 60         | 51         | 55         | 30         | 14         | 19         |
| 5.0 kb                     | 99           | 99         | 99         | 93         | 92         | 92         | 89         | 87         | 88         | 86         | 80         | 83         | 83         | 75         | 79         | 77         | 59         | 67         | 48         | 20         | 28         |
| 10 kb                      | 99           | 99         | 99         | 96         | 94         | 95         | 95         | 90         | 92         | 93         | 85         | 89         | 92         | 81         | 86         | 88         | 66         | 76         | 65         | 26         | 37         |
| 25 kb                      | 100          | 99         | 100        | 98         | 96         | 97         | 97         | 93         | 95         | 97         | 89         | 93         | 96         | 86         | 91         | 95         | 73         | 83         | 78         | 33         | 46         |
| 30 kb                      | 100          | 99         | 100        | 98         | 96         | 97         | 98         | 94         | 96         | 97         | 90         | 93         | 96         | 87         | 91         | 95         | 74         | 83         | 79         | 33         | 47         |
| 50 kb                      | 100          | 99         | 100        | 99         | 97         | 98         | 98         | 94         | 96         | 97         | 91         | 94         | 97         | 88         | 92         | 96         | 77         | 85         | 83         | 38         | 52         |
| Trinucleotide raw counts   |              |            |            |            |            |            |            |            |            |            |            |            |            |            |            |            |            |            |            |            |            |
| 0.5 kb                     | 94           | 99         | 96         | 60         | 87         | 71         | 43         | 77         | 55         | 30         | 60         | 40         | 24         | 50         | 32         | 17         | 32         | 23         | 6          | 6          | 6          |
| 1.0 kb                     | 96           | 99         | 97         | 70         | 88         | 78         | 57         | 80         | 66         | 45         | 66         | 54         | 38         | 58         | 46         | 30         | 40         | 34         | 12         | 10         | 11         |
| 2.5 kb                     | 98           | 99         | 98         | 83         | 90         | 87         | 75         | 85         | 80         | 68         | 75         | 71         | 62         | 69         | 65         | 53         | 52         | 53         | 27         | 17         | 21         |
| 5.0 kb                     | 99           | 99         | 99         | 91         | 93         | 92         | 86         | 88         | 87         | 82         | 81         | 82         | 78         | 76         | 77         | 71         | 61         | 66         | 44         | 23         | 30         |
| 10 kb                      | 99           | 99         | 99         | 95         | 94         | 95         | 93         | 91         | 92         | 91         | 86         | 88         | 88         | 81         | 85         | 84         | 68         | 75         | 60         | 30         | 40         |
| 25 kb                      | 100          | 99         | 100        | 98         | 96         | 97         | 97         | 93         | 95         | 96         | 90         | 93         | 95         | 86         | 90         | 93         | 74         | 83         | 73         | 36         | 48         |
| 30 kb                      | 100          | 100        | 100        | 98         | 96         | 97         | 97         | 94         | 95         | 96         | 90         | 93         | 95         | 87         | 91         | 93         | 76         | 83         | 76         | 38         | 50         |
| 50 kb                      | 100          | 100        | 100        | 98         | 96         | 97         | 97         | 94         | 96         | 97         | 91         | 94         | 96         | 88         | 92         | 94         | 77         | 85         | 79         | 41         | 54         |
| Dinucleotide raw counts    |              |            |            |            |            |            |            |            |            |            |            |            |            |            |            |            |            |            |            |            |            |
| 0.5 kb                     | 93           | 99         | 96         | 55         | 84         | 66         | 37         | 71         | 49         | 25         | 53         | 34         | 19         | 41         | 26         | 14         | 28         | 19         | 5          | 7          | 6          |
| 1.0 kb                     | 95           | 99         | 97         | 63         | 85         | 72         | 48         | 74         | 58         | 36         | 59         | 45         | 29         | 49         | 36         | 23         | 35         | 28         | 9          | 11         | 10         |
| 2.5 kb                     | 97           | 99         | 98         | 75         | 87         | 80         | 64         | 79         | 71         | 55         | 67         | 60         | 47         | 59         | 52         | 40         | 45         | 42         | 19         | 18         | 18         |
| 5.0 kb                     | 98           | 99         | 98         | 83         | 89         | 86         | 76         | 83         | 79         | 69         | 73         | 71         | 62         | 66         | 64         | 56         | 53         | 54         | 31         | 24         | 27         |
| 10 kb                      | 99           | 99         | 99         | 90         | 91         | 90         | 85         | 86         | 85         | 80         | 78         | 79         | 75         | 72         | 74         | 70         | 60         | 65         | 46         | 31         | 37         |
| 25 kb                      | 99           | 99         | 99         | 94         | 93         | 94         | 92         | 89         | 90         | 89         | 83         | 86         | 87         | 78         | 82         | 84         | 68         | 75         | 62         | 39         | 48         |
| 30 kb                      | 99           | 99         | 99         | 95         | 93         | 94         | 92         | 89         | 91         | 91         | 83         | 86         | 88         | 78         | 83         | 86         | 68         | 76         | 65         | 40         | 50         |
| 50 kb                      | 100          | 99         | 99         | 96         | 93         | 94         | 94         | 90         | 92         | 92         | 84         | 88         | 90         | 80         | 85         | 88         | 70         | 78         | 68         | 43         | 53         |



### Suppl. Table 1b

Classification statistics for known organisms with z-score-based GSOMs - classification accuracy of leave-out-datasets fragmented as described for Suppl. Table 1a, showing classification specificities [%] - *sp.*, sensitivities [%] - *sn.*, and F-measure values [%] - *fm.* of a growing SOMs trained with tri- and tetranucleotide normalized z-scores.

| Size                     | Superkingdom |            |            | Phylum     |            |            | Class      |            |            | Order      |            |            | Family     |            |            | Genus      |            |            | Species    |            |            |
|--------------------------|--------------|------------|------------|------------|------------|------------|------------|------------|------------|------------|------------|------------|------------|------------|------------|------------|------------|------------|------------|------------|------------|
|                          | <i>sp.</i>   | <i>sn.</i> | <i>fm.</i> | <i>sp.</i> | <i>sn.</i> | <i>fm.</i> | <i>sp.</i> | <i>sn.</i> | <i>fm.</i> | <i>sp.</i> | <i>sn.</i> | <i>fm.</i> | <i>sp.</i> | <i>sn.</i> | <i>fm.</i> | <i>sp.</i> | <i>sn.</i> | <i>fm.</i> | <i>sp.</i> | <i>sn.</i> | <i>fm.</i> |
| Tetranucleotide z-scores |              |            |            |            |            |            |            |            |            |            |            |            |            |            |            |            |            |            |            |            |            |
| 0.5 kb                   | 89           | 100        | 94         | 43         | 98         | 59         | 24         | 95         | 39         | 14         | 91         | 25         | 11         | 84         | 19         | 7          | 51         | 12         | 2          | 8          | 4          |
| 1.0 kb                   | 92           | 100        | 96         | 51         | 98         | 67         | 35         | 96         | 52         | 24         | 93         | 38         | 19         | 87         | 31         | 13         | 63         | 21         | 5          | 14         | 7          |
| 2.5 kb                   | 96           | 100        | 98         | 71         | 99         | 82         | 59         | 97         | 74         | 48         | 94         | 64         | 42         | 90         | 57         | 33         | 76         | 46         | 16         | 27         | 20         |
| 5.0 kb                   | 98           | 100        | 99         | 86         | 99         | 92         | 80         | 97         | 88         | 73         | 95         | 82         | 67         | 92         | 78         | 59         | 82         | 68         | 36         | 38         | 37         |
| 10 kb                    | 99           | 100        | 100        | 95         | 99         | 97         | 92         | 98         | 95         | 89         | 96         | 92         | 86         | 93         | 90         | 81         | 85         | 83         | 61         | 49         | 54         |
| 25 kb                    | 100          | 100        | 100        | 98         | 100        | 99         | 97         | 99         | 98         | 97         | 98         | 97         | 96         | 96         | 96         | 93         | 89         | 91         | 81         | 58         | 67         |
| 30 kb                    | 100          | 100        | 100        | 98         | 100        | 99         | 98         | 99         | 98         | 97         | 98         | 97         | 96         | 96         | 96         | 94         | 90         | 92         | 83         | 58         | 68         |
| 50 kb                    | 100          | 100        | 100        | 99         | 100        | 99         | 98         | 99         | 99         | 97         | 98         | 98         | 97         | 97         | 97         | 96         | 91         | 93         | 86         | 61         | 71         |
| Trinucleotide z-scores   |              |            |            |            |            |            |            |            |            |            |            |            |            |            |            |            |            |            |            |            |            |
| 0.5 kb                   | 94           | 99         | 97         | 13         | 41         | 20         | 8          | 37         | 13         | 2          | 8          | 4          | 1          | 3          | 2          | 1          | 3          | 1          | 1          | 2          | 1          |
| 1.0 kb                   | 93           | 100        | 96         | 56         | 95         | 71         | 40         | 91         | 55         | 28         | 83         | 42         | 23         | 76         | 35         | 16         | 55         | 25         | 7          | 16         | 10         |
| 2.5 kb                   | 97           | 100        | 98         | 74         | 95         | 84         | 64         | 92         | 75         | 54         | 87         | 67         | 49         | 83         | 61         | 40         | 67         | 50         | 22         | 28         | 25         |
| 5.0 kb                   | 99           | 100        | 99         | 88         | 96         | 92         | 82         | 94         | 88         | 76         | 91         | 83         | 72         | 87         | 79         | 66         | 75         | 70         | 44         | 39         | 41         |
| 10 kb                    | 99           | 100        | 100        | 95         | 98         | 96         | 93         | 96         | 94         | 90         | 93         | 92         | 88         | 91         | 90         | 85         | 81         | 83         | 66         | 49         | 56         |
| 25 kb                    | 100          | 100        | 100        | 98         | 98         | 98         | 97         | 97         | 97         | 96         | 96         | 96         | 95         | 94         | 95         | 94         | 86         | 90         | 82         | 56         | 67         |
| 30 kb                    | 100          | 100        | 100        | 98         | 99         | 98         | 97         | 98         | 98         | 97         | 96         | 96         | 96         | 95         | 95         | 95         | 87         | 90         | 83         | 57         | 68         |
| 50 kb                    | 100          | 100        | 100        | 98         | 99         | 99         | 98         | 98         | 98         | 97         | 97         | 97         | 97         | 96         | 96         | 95         | 89         | 92         | 85         | 61         | 71         |

**Suppl. Table 1c**

Classification statistics for known organisms with raw count-based BLSOMs - classification accuracy of leave-out-datasets fragmented as described for Suppl. Table 1a, showing classification specificities [%] - *sp.*, sensitivities [%] - *sn.*, and F-measure values [%] - *fm.* of batch-learning SOMs trained with di-, tri-, and tetranucleotide raw counts.

| Size                       | Superkingdom |            |            | Phylum     |            |            | Class      |            |            | Order      |            |            | Family     |            |            | Genus      |            |            | Species    |            |            |
|----------------------------|--------------|------------|------------|------------|------------|------------|------------|------------|------------|------------|------------|------------|------------|------------|------------|------------|------------|------------|------------|------------|------------|
|                            | <i>sp.</i>   | <i>sn.</i> | <i>fm.</i> | <i>sp.</i> | <i>sn.</i> | <i>fm.</i> | <i>sp.</i> | <i>sn.</i> | <i>fm.</i> | <i>sp.</i> | <i>sn.</i> | <i>fm.</i> | <i>sp.</i> | <i>sn.</i> | <i>fm.</i> | <i>sp.</i> | <i>sn.</i> | <i>fm.</i> | <i>sp.</i> | <i>sn.</i> | <i>fm.</i> |
| Tetranucleotide raw counts |              |            |            |            |            |            |            |            |            |            |            |            |            |            |            |            |            |            |            |            |            |
| 0.5 kb                     | 94           | 99         | 97         | 55         | 89         | 68         | 36         | 78         | 49         | 23         | 59         | 33         | 16         | 45         | 23         | 10         | 25         | 14         | 3          | 5          | 4          |
| 1.0 kb                     | 96           | 99         | 97         | 64         | 89         | 75         | 49         | 80         | 61         | 36         | 65         | 46         | 27         | 52         | 36         | 19         | 32         | 24         | 7          | 7          | 7          |
| 2.5 kb                     | 97           | 99         | 98         | 79         | 91         | 84         | 69         | 83         | 76         | 60         | 73         | 66         | 52         | 64         | 57         | 41         | 44         | 42         | 19         | 14         | 16         |
| 5.0 kb                     | 98           | 99         | 99         | 88         | 93         | 90         | 82         | 87         | 85         | 76         | 79         | 78         | 71         | 73         | 72         | 61         | 54         | 57         | 36         | 20         | 25         |
| 10 kb                      | 99           | 99         | 99         | 94         | 95         | 94         | 91         | 91         | 91         | 88         | 84         | 86         | 84         | 79         | 82         | 79         | 61         | 69         | 55         | 26         | 35         |
| 25 kb                      | 100          | 100        | 100        | 97         | 96         | 97         | 96         | 94         | 95         | 95         | 89         | 92         | 93         | 86         | 89         | 91         | 69         | 79         | 73         | 32         | 45         |
| 30 kb                      | 100          | 100        | 100        | 98         | 96         | 97         | 96         | 94         | 95         | 95         | 90         | 92         | 94         | 86         | 90         | 92         | 70         | 80         | 75         | 33         | 46         |
| 50 kb                      | 100          | 100        | 100        | 98         | 97         | 97         | 97         | 95         | 96         | 96         | 91         | 94         | 95         | 88         | 92         | 94         | 74         | 83         | 80         | 36         | 50         |
| Trinucleotide raw counts   |              |            |            |            |            |            |            |            |            |            |            |            |            |            |            |            |            |            |            |            |            |
| 0.5 kb                     | 95           | 99         | 97         | 57         | 85         | 68         | 39         | 72         | 51         | 27         | 54         | 36         | 21         | 44         | 28         | 14         | 27         | 19         | 4          | 5          | 4          |
| 1.0 kb                     | 96           | 99         | 97         | 65         | 86         | 74         | 51         | 75         | 61         | 39         | 60         | 48         | 32         | 51         | 39         | 24         | 33         | 28         | 8          | 7          | 7          |
| 2.5 kb                     | 97           | 99         | 98         | 78         | 88         | 83         | 69         | 80         | 74         | 60         | 69         | 64         | 54         | 61         | 57         | 43         | 43         | 43         | 18         | 12         | 14         |
| 5.0 kb                     | 98           | 99         | 99         | 87         | 90         | 88         | 81         | 84         | 82         | 76         | 75         | 75         | 70         | 68         | 69         | 62         | 51         | 56         | 32         | 17         | 22         |
| 10 kb                      | 99           | 99         | 99         | 93         | 92         | 92         | 90         | 87         | 88         | 86         | 80         | 83         | 83         | 75         | 79         | 78         | 59         | 67         | 49         | 22         | 31         |
| 25 kb                      | 100          | 100        | 100        | 97         | 94         | 95         | 95         | 90         | 93         | 94         | 85         | 89         | 93         | 81         | 86         | 91         | 66         | 76         | 67         | 28         | 40         |
| 30 kb                      | 100          | 100        | 100        | 97         | 94         | 96         | 96         | 91         | 93         | 94         | 86         | 90         | 93         | 82         | 87         | 91         | 67         | 77         | 70         | 29         | 41         |
| 50 kb                      | 100          | 100        | 100        | 98         | 94         | 96         | 96         | 91         | 94         | 96         | 86         | 91         | 95         | 83         | 88         | 94         | 69         | 80         | 74         | 32         | 44         |
| Dinucleotide raw counts    |              |            |            |            |            |            |            |            |            |            |            |            |            |            |            |            |            |            |            |            |            |
| 0.5 kb                     | 94           | 96         | 95         | 62         | 60         | 61         | 43         | 40         | 41         | 31         | 25         | 28         | 23         | 18         | 20         | 18         | 12         | 14         | 6          | 3          | 4          |
| 1.0 kb                     | 96           | 96         | 96         | 72         | 62         | 67         | 57         | 45         | 50         | 47         | 31         | 38         | 39         | 23         | 29         | 33         | 16         | 21         | 14         | 5          | 7          |
| 2.5 kb                     | 98           | 96         | 97         | 85         | 67         | 75         | 76         | 53         | 63         | 71         | 40         | 51         | 64         | 32         | 43         | 59         | 23         | 33         | 32         | 8          | 13         |
| 5.0 kb                     | 99           | 97         | 98         | 92         | 71         | 80         | 86         | 60         | 71         | 84         | 47         | 60         | 79         | 39         | 52         | 77         | 30         | 43         | 52         | 11         | 19         |
| 10 kb                      | 99           | 97         | 98         | 96         | 75         | 84         | 92         | 64         | 76         | 92         | 53         | 67         | 89         | 45         | 60         | 88         | 35         | 51         | 68         | 15         | 24         |
| 25 kb                      | 100          | 98         | 99         | 98         | 79         | 87         | 95         | 69         | 80         | 95         | 58         | 72         | 93         | 50         | 65         | 93         | 40         | 56         | 77         | 18         | 29         |
| 30 kb                      | 100          | 98         | 99         | 98         | 79         | 87         | 95         | 69         | 80         | 95         | 58         | 72         | 93         | 51         | 66         | 94         | 41         | 57         | 78         | 18         | 29         |
| 50 kb                      | 100          | 98         | 99         | 98         | 80         | 88         | 96         | 70         | 81         | 96         | 59         | 73         | 94         | 53         | 67         | 94         | 43         | 59         | 80         | 19         | 31         |

**Suppl. Table 1d**

Classification statistics of leave-out-datasets fragmented as described for Suppl. Table 1a, showing classification specificities [%] - *sp.*, sensitivities [%] - *sn.*, and F-measure values [%] - *fm.* of batch-learning SOMs trained with batch-learning SOMs trained with tri-, and tetranucleotide z-scores.

| Size                     | Superkingdom |            |            | Phylum     |            |            | Class      |            |            | Order      |            |            | Family     |            |            | Genus      |            |            | Species    |            |            |
|--------------------------|--------------|------------|------------|------------|------------|------------|------------|------------|------------|------------|------------|------------|------------|------------|------------|------------|------------|------------|------------|------------|------------|
|                          | <i>sp.</i>   | <i>sn.</i> | <i>fm.</i> | <i>sp.</i> | <i>sn.</i> | <i>fm.</i> | <i>sp.</i> | <i>sn.</i> | <i>fm.</i> | <i>sp.</i> | <i>sn.</i> | <i>fm.</i> | <i>sp.</i> | <i>sn.</i> | <i>fm.</i> | <i>sp.</i> | <i>sn.</i> | <i>fm.</i> | <i>sp.</i> | <i>sn.</i> | <i>fm.</i> |
| Tetranucleotide z-scores |              |            |            |            |            |            |            |            |            |            |            |            |            |            |            |            |            |            |            |            |            |
| 0.5 kb                   | 90           | 99         | 94         | 44         | 96         | 61         | 24         | 91         | 38         | 14         | 81         | 23         | 10         | 71         | 18         | 6          | 43         | 10         | 2          | 7          | 3          |
| 1.0 kb                   | 92           | 99         | 96         | 52         | 96         | 67         | 34         | 93         | 50         | 22         | 85         | 35         | 17         | 76         | 28         | 10         | 51         | 17         | 4          | 10         | 6          |
| 2.5 kb                   | 96           | 100        | 98         | 69         | 97         | 80         | 55         | 94         | 70         | 44         | 88         | 58         | 37         | 80         | 50         | 27         | 62         | 37         | 12         | 18         | 14         |
| 5.0 kb                   | 98           | 100        | 99         | 84         | 98         | 90         | 76         | 95         | 84         | 68         | 90         | 77         | 61         | 83         | 71         | 51         | 70         | 59         | 29         | 26         | 27         |
| 10 kb                    | 99           | 100        | 100        | 94         | 99         | 96         | 90         | 96         | 93         | 87         | 92         | 89         | 83         | 87         | 85         | 77         | 76         | 77         | 54         | 35         | 42         |
| 25 kb                    | 100          | 100        | 100        | 98         | 99         | 98         | 97         | 97         | 97         | 96         | 95         | 95         | 95         | 92         | 93         | 92         | 81         | 86         | 77         | 42         | 54         |
| 30 kb                    | 100          | 100        | 100        | 98         | 99         | 98         | 97         | 98         | 97         | 96         | 95         | 96         | 95         | 92         | 94         | 93         | 82         | 87         | 79         | 42         | 55         |
| 50 kb                    | 100          | 100        | 100        | 98         | 99         | 99         | 98         | 98         | 98         | 97         | 96         | 96         | 96         | 93         | 95         | 95         | 84         | 89         | 84         | 44         | 58         |
| Trinucleotide z-scores   |              |            |            |            |            |            |            |            |            |            |            |            |            |            |            |            |            |            |            |            |            |
| 0.5 kb                   | 89           | 100        | 94         | 44         | 95         | 60         | 23         | 90         | 37         | 13         | 78         | 22         | 9          | 68         | 15         | 5          | 40         | 10         | 2          | 7          | 3          |
| 1.0 kb                   | 92           | 100        | 96         | 52         | 95         | 67         | 34         | 91         | 49         | 21         | 81         | 34         | 16         | 73         | 26         | 11         | 49         | 18         | 4          | 10         | 5          |
| 2.5 kb                   | 96           | 100        | 98         | 67         | 95         | 79         | 54         | 93         | 68         | 42         | 85         | 56         | 35         | 79         | 49         | 27         | 61         | 37         | 11         | 18         | 14         |
| 5.0 kb                   | 98           | 100        | 99         | 81         | 96         | 88         | 73         | 94         | 82         | 64         | 88         | 75         | 59         | 84         | 69         | 50         | 69         | 58         | 26         | 26         | 26         |
| 10 kb                    | 99           | 100        | 99         | 92         | 97         | 94         | 88         | 95         | 91         | 84         | 91         | 87         | 80         | 88         | 84         | 74         | 75         | 75         | 50         | 34         | 40         |
| 25 kb                    | 100          | 100        | 100        | 97         | 98         | 98         | 96         | 97         | 96         | 94         | 95         | 94         | 93         | 92         | 93         | 91         | 81         | 86         | 76         | 42         | 54         |
| 30 kb                    | 100          | 100        | 100        | 97         | 98         | 98         | 96         | 97         | 97         | 95         | 95         | 95         | 94         | 93         | 94         | 93         | 82         | 87         | 78         | 43         | 56         |
| 50 kb                    | 100          | 100        | 100        | 99         | 99         | 99         | 98         | 98         | 98         | 98         | 96         | 96         | 97         | 93         | 95         | 96         | 84         | 89         | 84         | 44         | 58         |

## Suppl. Table 2

Informations on the separation quality of the SOMs used for the taxonomic classification of simulated metagenomes that were constructed from all bacterial and archaeal DNA sequences exceeding 485 kb (roughly the size of *Nanoarchaeum equitans*) in the NCBI GenBank database as of October 2008 (release no. 167). Given are the total number of nodes in the SOM, number of pure nodes (i.e. nodes containing DNA-fragments of a single taxon on the respective taxonomic level) and number of ambiguous nodes (nodes representing DNA-fragments of more than one taxon on the respective taxonomic level). The last column reflects the number of nodes containing DNA fragments from an organism with no taxonomic information on that taxonomic level (e.g. the Epsilonproteobacteria *Sulforovum* sp. NBC 37-1 has no defined taxonomic classification for the taxonomic levels class, order and genus).

## Suppl. Table 2a

*GSOM - 50 kb training sequence length - tetranucleotide z-scores*

| taxon        | total nodes   | pure nodes    | ambiguous nodes | without taxonomy |
|--------------|---------------|---------------|-----------------|------------------|
| Superkingdom | 10 412 (100%) | 10 407 (100%) | 5 (0%)          | 0 (0%)           |
| Phylum       | 10 412 (100%) | 10 355 (99%)  | 51 (0%)         | 6 (0%)           |
| Class        | 10 412 (100%) | 9 702 (93%)   | 100 (1%)        | 610 (6%)         |
| Order        | 10 412 (100%) | 10 042 (96%)  | 183 (2%)        | 187 (2%)         |
| Family       | 10 412 (100%) | 9 468 (91%)   | 278 (3%)        | 666 (6%)         |
| Genus        | 10 412 (100%) | 9 543 (92%)   | 731 (7%)        | 138 (1%)         |
| Species      | 10 412 (100%) | 6 988 (67%)   | 3 424 (33%)     | 0 (0%)           |

## Suppl. Table 2b

*BLSOM - 50 kb training sequence length - tetranucleotide z-scores*

| taxon        | total nodes  | pure nodes   | ambiguous nodes | without taxonomy |
|--------------|--------------|--------------|-----------------|------------------|
| Superkingdom | 9 834 (100%) | 9 827 (100%) | 7 (0%)          | 0 (0%)           |
| Phylum       | 9 834 (100%) | 9 765 (99%)  | 63 (1%)         | 6 (0%)           |
| Class        | 9 834 (100%) | 9 393 (96%)  | 117 (1%)        | 324 (3%)         |
| Order        | 9 834 (100%) | 9 474 (96%)  | 209 (2%)        | 151 (2%)         |
| Family       | 9 834 (100%) | 9 049 (92%)  | 324 (3%)        | 461 (5%)         |
| Genus        | 9 834 (100%) | 8 937 (91%)  | 786 (8%)        | 111 (1%)         |
| Species      | 9 834 (100%) | 6 587 (67%)  | 3 247 (33%)     | 0 (0%)           |

### Suppl. Table 3

Informations on the separation quality of the SOMs that were used for the classification of the leave-out-datasets. Information shown as described for Suppl. Table 2.

### Suppl. Table 3a

GSOMs as described in Suppl. Table 1a.

| taxon                     | total nodes   | pure nodes   | ambiguous nodes | without taxonomy |
|---------------------------|---------------|--------------|-----------------|------------------|
| Tetranucleotide rawcounts |               |              |                 |                  |
| Superkingdom              | 10 801 (100%) | 10 722 (99%) | 78 (1%)         | 1 (0%)           |
| Phylum                    | 10 801 (100%) | 10 325 (96%) | 475 (4%)        | 1 (0%)           |
| Class                     | 10 801 (100%) | 9587 (89%)   | 689 (6%)        | 525 (5%)         |
| Order                     | 10 801 (100%) | 9595 (89%)   | 1 045 (10%)     | 161 (1%)         |
| Family                    | 10 801 (100%) | 9032 (84%)   | 1 315 (12%)     | 454 (4%)         |
| Genus                     | 10 801 (100%) | 8502 (79%)   | 2 254 (21%)     | 45 (0%)          |
| Species                   | 10 801 (100%) | 5234 (48%)   | 4 989 (46%)     | 578 (5%)         |
| Trinucleotide rawcounts   |               |              |                 |                  |
| Superkingdom              | 15 472 (100%) | 15 364 (99%) | 104 (1%)        | 4 (0%)           |
| Phylum                    | 15 472 (100%) | 14 783 (96%) | 685 (4%)        | 4 (0%)           |
| Class                     | 15 472 (100%) | 13 920 (90%) | 964 (6%)        | 588 (4%)         |
| Order                     | 15 472 (100%) | 13 715 (89%) | 1 526 (10%)     | 231 (1%)         |
| Family                    | 15 472 (100%) | 13 017 (84%) | 1 877 (12%)     | 578 (4%)         |
| Genus                     | 15 472 (100%) | 12 166 (79%) | 3 253 (21%)     | 53 (0%)          |
| Species                   | 15 472 (100%) | 8 069 (52%)  | 6 585 (43%)     | 818 (5%)         |
| Dinucleotide rawcounts    |               |              |                 |                  |
| Superkingdom              | 20 793 (100%) | 20 621 (99%) | 167 (1%)        | 5 (0%)           |
| Phylum                    | 20 793 (100%) | 19 316 (93%) | 1 472 (7%)      | 5 (0%)           |
| Class                     | 20 793 (100%) | 17 980 (86%) | 2 012 (10%)     | 801 (4%)         |
| Order                     | 20 793 (100%) | 17 378 (84%) | 3 081 (15%)     | 334 (2%)         |
| Family                    | 20 793 (100%) | 16 239 (78%) | 3 678 (18%)     | 876 (4%)         |
| Genus                     | 20 793 (100%) | 15 510 (75%) | 5 159 (25%)     | 124 (1%)         |
| Species                   | 20 793 (100%) | 11 674 (56%) | 7 991 (38%)     | 1 128 (5%)       |

### Suppl. Table 3b

GSOMs as described in Suppl. Table 1b.

| taxon                   | total nodes   | pure nodes    | ambiguous nodes | without taxonomy |
|-------------------------|---------------|---------------|-----------------|------------------|
| Tetranucleotide zscores |               |               |                 |                  |
| Superkingdom            | 9 063 (100%)  | 9 055 (100%)  | 5 (0%)          | 3 (0%)           |
| Phylum                  | 9 063 (100%)  | 9 017 (99%)   | 43 (0%)         | 3 (0%)           |
| Class                   | 9 063 (100%)  | 8 488 (94%)   | 87 (1%)         | 488 (5%)         |
| Order                   | 9 063 (100%)  | 8 794 (97%)   | 159 (2%)        | 110 (1%)         |
| Family                  | 9 063 (100%)  | 8 456 (93%)   | 250 (3%)        | 357 (4%)         |
| Genus                   | 9 063 (100%)  | 8 359 (92%)   | 670 (7%)        | 34 (0%)          |
| Species                 | 9 063 (100%)  | 6 159 (68%)   | 2 256 (25%)     | 648 (7%)         |
| Trinucleotide zscores   |               |               |                 |                  |
| Superkingdom            | 22 145 (100%) | 22 092 (100%) | 52 (0%)         | 1 (0%)           |
| Phylum                  | 22 145 (100%) | 21 698 (98%)  | 446 (2%)        | 1 (0%)           |
| Class                   | 22 145 (100%) | 20 513 (93%)  | 664 (3%)        | 968 (4%)         |
| Order                   | 22 145 (100%) | 20 800 (94%)  | 1 075 (5%)      | 270 (1%)         |
| Family                  | 22 145 (100%) | 19 741 (89%)  | 1 402 (6%)      | 1 002 (5%)       |
| Genus                   | 22 145 (100%) | 19 489 (88%)  | 2 565 (12%)     | 91 (0%)          |
| Species                 | 22145 (100%)  | 14418 (65%)   | 6014 (27%)      | 1713 (8%)        |

### Suppl. Table 3c

BLSOMs as described in Suppl. Table 1c.

| taxon                     | total nodes   | pure nodes   | ambiguous nodes | without taxonomy |
|---------------------------|---------------|--------------|-----------------|------------------|
| Tetranucleotide rawcounts |               |              |                 |                  |
| Superkingdom              | 4 918 (100%)  | 4 893 (99%)  | 22 (0%)         | 3 (0%)           |
| Phylum                    | 4 918 (100%)  | 4 740 (96%)  | 175 (4%)        | 3 (0%)           |
| Class                     | 4 918 (100%)  | 4 407 (90%)  | 247 (5%)        | 264 (5%)         |
| Order                     | 4 918 (100%)  | 4 426 (90%)  | 397 (8%)        | 95 (2%)          |
| Family                    | 4 918 (100%)  | 4 129 (84%)  | 493 (10%)       | 296 (6%)         |
| Genus                     | 4 918 (100%)  | 4 047 (82%)  | 846 (17%)       | 25 (1%)          |
| Species                   | 4 918 (100%)  | 2 904 (59%)  | 1 622 (33%)     | 392 (8%)         |
| Trinucleotide rawcounts   |               |              |                 |                  |
| Superkingdom              | 5 765 (100%)  | 5 719 (99%)  | 35 (1%)         | 11 (0%)          |
| Phylum                    | 5 765 (100%)  | 5 465 (95%)  | 289 (5%)        | 11 (0%)          |
| Class                     | 5 765 (100%)  | 5 206 (90%)  | 392 (7%)        | 167 (3%)         |
| Order                     | 5 765 (100%)  | 5 092 (88%)  | 584 (10%)       | 89 (2%)          |
| Family                    | 5 765 (100%)  | 4 878 (85%)  | 714 (12%)       | 173 (3%)         |
| Genus                     | 5 765 (100%)  | 4 584 (80%)  | 1 146 (20%)     | 35 (1%)          |
| Species                   | 5 765 (100%)  | 3 178 (55%)  | 2 309 (40%)     | 278 (5%)         |
| Dinucleotide rawcounts    |               |              |                 |                  |
| Superkingdom              | 33 850 (100%) | 32 702 (97%) | 1 140 (3%)      | 8 (0%)           |
| Phylum                    | 33 850 (100%) | 25 806 (76%) | 8 036 (24%)     | 8 (0%)           |
| Class                     | 33 850 (100%) | 22 601 (67%) | 10 009 (30%)    | 1 240 (4%)       |
| Order                     | 33 850 (100%) | 20 276 (60%) | 13 205 (39%)    | 369 (1%)         |
| Family                    | 33 850 (100%) | 17 832 (53%) | 14 653 (43%)    | 1 365 (4%)       |
| Genus                     | 33 850 (100%) | 16 391 (48%) | 17 383 (51%)    | 76 (0%)          |
| Species                   | 33 850 (100%) | 11 961 (35%) | 20 495 (61%)    | 1 394 (4%)       |

### Suppl. Table 3d

BLSOMs as described in Suppl. Table 1d.

#### *Tetranucleotide z-scores:*

| taxon                   | total nodes  | pure nodes   | ambiguous nodes | without taxonomy |
|-------------------------|--------------|--------------|-----------------|------------------|
| Tetranucleotide zscores |              |              |                 |                  |
| Superkingdom            | 5 932 (100%) | 5 916 (100%) | 14 (0%)         | 2 (0%)           |
| Phylum                  | 5 932 (100%) | 5 863 (99%)  | 67 (1%)         | 2 (0%)           |
| Class                   | 5 932 (100%) | 5 654 (95%)  | 120 (2%)        | 158 (3%)         |
| Order                   | 5 932 (100%) | 5 672 (96%)  | 209 (4%)        | 51 (1%)          |
| Family                  | 5 932 (100%) | 5 431 (92%)  | 314 (5%)        | 187 (3%)         |
| Genus                   | 5 932 (100%) | 5 268 (89%)  | 650 (11%)       | 14 (0%)          |
| Species                 | 5 932 (100%) | 3 811 (64%)  | 1 677 (28%)     | 444 (7%)         |
| Trinucleotide zscores   |              |              |                 |                  |
| Superkingdom            | 6 299 (100%) | 6 287 (100%) | 10 (0%)         | 2 (0%)           |
| Phylum                  | 6 299 (100%) | 6 184 (98%)  | 113 (2%)        | 2 (0%)           |
| Class                   | 6 299 (100%) | 5 956 (95%)  | 165 (3%)        | 178 (3%)         |
| Order                   | 6 299 (100%) | 5 940 (94%)  | 280 (4%)        | 79 (1%)          |
| Family                  | 6 299 (100%) | 5 657 (90%)  | 363 (6%)        | 279 (4%)         |
| Genus                   | 6 299 (100%) | 5 643 (90%)  | 630 (10%)       | 26 (0%)          |
| Species                 | 6 299 (100%) | 4 079 (65%)  | 1 791 (28%)     | 429 (7%)         |



### Suppl. Table 4a

Computation speed of the GSOM-based classifications of the simulated metagenome datasets mimicking habitats of varying complexities (see Figure 1):

| contigs of 8 kb or larger (simLC, simMC) |                 |          | all contigs (simLC, simMC, simHC) |                 |          |
|------------------------------------------|-----------------|----------|-----------------------------------|-----------------|----------|
| dataset                                  | no. of elements | time [s] | dataset                           | no. of elements | time [s] |
| simLCPhrap                               | 229             | 16       | simLCPhrap                        | 12 665          | 288      |
| simLCPhrap                               | 202             | 15       | simLCArachne                      | 2 362           | 62       |
| simMCPPhrap                              | 401             | 20       | simMCPPhrap                       | 15 197          | 336      |
| simMCPPhrap                              | 301             | 18       | simMCArachne                      | 7 307           | 173      |
|                                          |                 |          | simHCPPhrap                       | 23 398          | 530      |
|                                          |                 |          | simHCArachne                      | 578             | 26       |

### Suppl. Table 4b

Computation speed of the BLSOM-based classifications of simulated metagenome datasets mimicking habitats of varying complexities (see Figure 2):

| contigs of 8 kb or larger (simLC, simMC) |                 |          | all contigs (simLC, simMC, simHC) |                 |          |
|------------------------------------------|-----------------|----------|-----------------------------------|-----------------|----------|
| dataset                                  | no. of elements | time [s] | dataset                           | no. of elements | time [s] |
| simLCPhrap                               | 229             | 12       | simLCPhrap                        | 12 665          | 271      |
| simLCPhrap                               | 202             | 11       | simLCArachne                      | 2 362           | 56       |
| simMCPPhrap                              | 401             | 15       | simMCPPhrap                       | 15 197          | 329      |
| simMCPPhrap                              | 301             | 15       | simMCArachne                      | 7 307           | 178      |
|                                          |                 |          | simHCPPhrap                       | 23 398          | 478      |
|                                          |                 |          | simHCArachne                      | 578             | 22       |

**Suppl. Table 5a**

Computation speed for the classification of known organisms with raw count-based GSOMs, z-score-based GSOMs, raw-count based BLSOMs, and z-score-based BLSOMs. Time values for the classifications of fragments of 0.5 kb to 50 kb sizes along with the total number of elements in the particular dataset and motif lengths from di- to tetranucleotides are shown. Fragments were on SOMs trained with oligonucleotide raw counts and z-scores, as described in Suppl. Table 1a to d.

|                  | dataset | no. of elements | raw count GSOM<br>time | z-score GSOM<br>time | raw count BLSOM<br>time | z-score BLSOM<br>time |
|------------------|---------|-----------------|------------------------|----------------------|-------------------------|-----------------------|
| Tetranucleotides | 0.5 kb  | 1 085 582       | 405 min 13 s           | 355 min 20 s         | 184 min 23 s            | 223 min 30 s          |
|                  | 1.0 kb  | 543 138         | 199 min 23 s           | 169 min 41 s         | 92 min 7 s              | 111 min 30 s          |
|                  | 2.5 kb  | 217 688         | 79 min 57 s            | 68 min 4 s           | 37 min 12 s             | 45 min 12 s           |
|                  | 5 kb    | 109 213         | 42 min 36 s            | 34 min 13 s          | 18 min 41 s             | 23 min 1 s            |
|                  | 10 kb   | 54 978          | 20 min 31 s            | 17 min 18 s          | 9 min 23 s              | 11 min 51 s           |
|                  | 25 kb   | 22 485          | 8 min 30 s             | 7 min 9 s            | 3 min 53 s              | 4 min 47 s            |
|                  | 30 kb   | 18 885          | 7 min 7 s              | 6 min 2 s            | 3 min 18 s              | 3 min 56 s            |
|                  | 50 kb   | 11 673          | 4 min 28 s             | 3 min 49 s           | 2 min 4 s               | 2 min 27 s            |
| Trinucleotides   | 0.5 kb  | 1 085 582       | 170 min 30 s           | 241 min 30 s         | 55 min 36 s             | 63 min 9 s            |
|                  | 1.0 kb  | 543 138         | 85 min 58 s            | 119 min 52 s         | 29 min 24 s             | 34 min 50 s           |
|                  | 2.5 kb  | 217 688         | 34 min 35 s            | 48 min 8 s           | 11 min 28 s             | 12 min 39 s           |
|                  | 5 kb    | 109 213         | 17 min 26 s            | 24 min 23 s          | 5 min 54 s              | 6 min 19 s            |
|                  | 10 kb   | 54 978          | 8 min 49 s             | 12 min 21 s          | 2 min 57 s              | 3 min 15 s            |
|                  | 25 kb   | 22 485          | 3 min 40 s             | 5 min 7 s            | 1 min 14 s              | 1 min 21 s            |
|                  | 30 kb   | 18 885          | 2 min 36s              | 4 min 20 s           | 1 min 5 s               | 1 min 8 s             |
|                  | 50 kb   | 11 673          | 1 min 57 s             | 2 min 44 s           | 0 min 39 s              | 0 min 43 s            |
| Dinucleotides    | 0.5 kb  | 1 085 582       | 81 min 3 s             |                      | 158 min 45 s            |                       |
|                  | 1.0 kb  | 543 138         | 39 min 49 s            |                      | 88 min 25 s             |                       |
|                  | 2.5 kb  | 217 688         | 16 min 0 s             |                      | 36 min 47 s             |                       |
|                  | 5 kb    | 109 213         | 8 min 5 s              |                      | 14 min 58 s             |                       |
|                  | 10 kb   | 54 978          | 4 min 8 s              |                      | 7 min 9 s               |                       |
|                  | 25 kb   | 22 485          | 1 min 44 s             |                      | 2 min 59 s              |                       |
|                  | 30 kb   | 18 885          | 1 min 28 s             |                      | 3 min 12 s              |                       |
|                  | 50 kb   | 11 673          | 0 min 56 s             |                      | 1 min 58 s              |                       |

## Suppl. Table 6

Time statistics for biodiversity assessments of the North Sea metagenomes over time using Taxonomic classification of assemblies exceeding 2.5 kb with TaxSOM, as described in Material and Methods (Real-world dataset) and Figure 3.

| dataset            | no. of elements | time |
|--------------------|-----------------|------|
| 11th February 2009 | 227             | 7 s  |
| 31th March 2009    | 2 321           | 29 s |
| 7th April 2009     | 3 229           | 38 s |
| 14th April 2009    | 2 999           | 36 s |
| 16th June 2009     | 1 137           | 16 s |

## References

- Abe T, Kanaya S, Kinouchi M, Ichiba Y, Kozuki T, Ikemura T. (2003). Informatics for unveiling hidden genome signatures. *Genome Res* **13**: 693-702.
- Alahakoon D, Halgamuge SK, Srinivasan B. (2000). Dynamic Self-Organizing Maps with Controlled Growth for Knowledge Discovery. *IEEE Transactions on Neural Networks* **11**: 601-614.
- Chan C-KK, Hsu AL, Tang S-L, Halgamuge SK. (2007). Using Growing Self-Organising Maps to Improve the Binning Process in Environmental Whole-Genome Shotgun Sequencing. *Journal of Biomedicine and Biotechnology* **2008**:
- Kohonen T, Kohonen T, Schroeder MR, Huang TS, Maps SO. (2001). Springer-Verlag New York. *Inc, Secaucus, NJ*
- Schbath S, Prum B, de Turckheim E. (1995). Exceptional motifs in different Markov chain models for a statistical analysis of DNA sequences. *J Comput Biol* **2**: 417-437.
- Teeling H, Meyerdierks A, Bauer M, Amann R, Glöckner FO. (2004). Application of tetranucleotide frequencies for the assignment of genomic fragments. *Environ Microbiol* **6**: 938-947.
