# Supplementary material
Source: PubMed Central journal article supplement (PMC3105762)

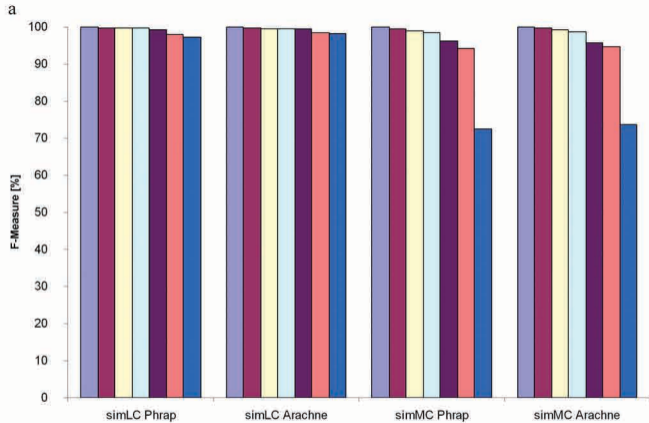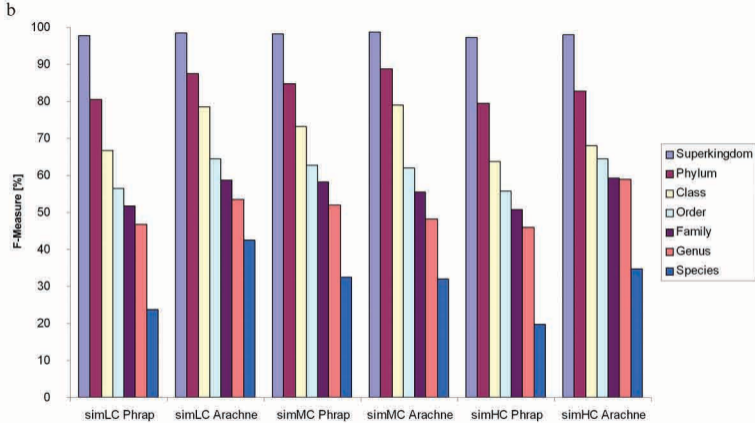

Supplement: ismej2010180x1.pdf [file ismej2010180x1.pdf]

a (i)

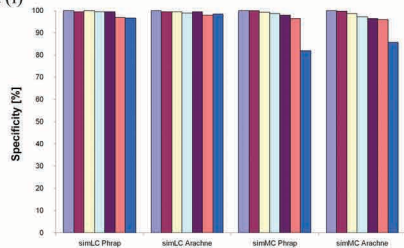

a (ii)

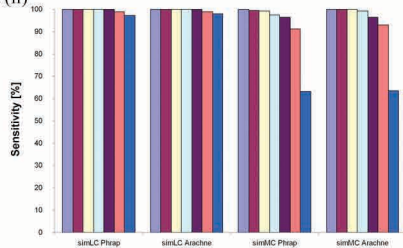

a (iii)

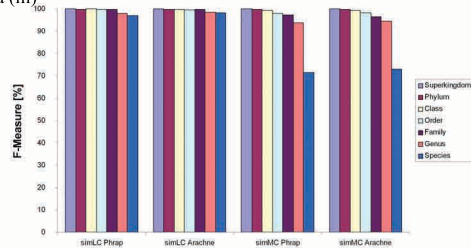

b (i)

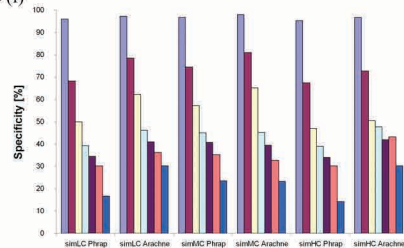

b (ii)

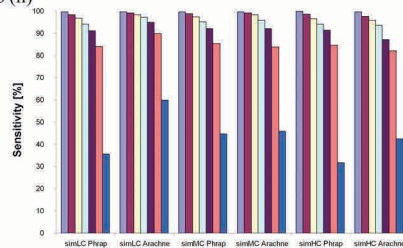

b (iii)

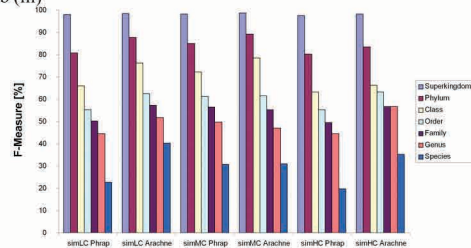

Supplement: ismej2010180x2.pdf [file ismej2010180x2.pdf]

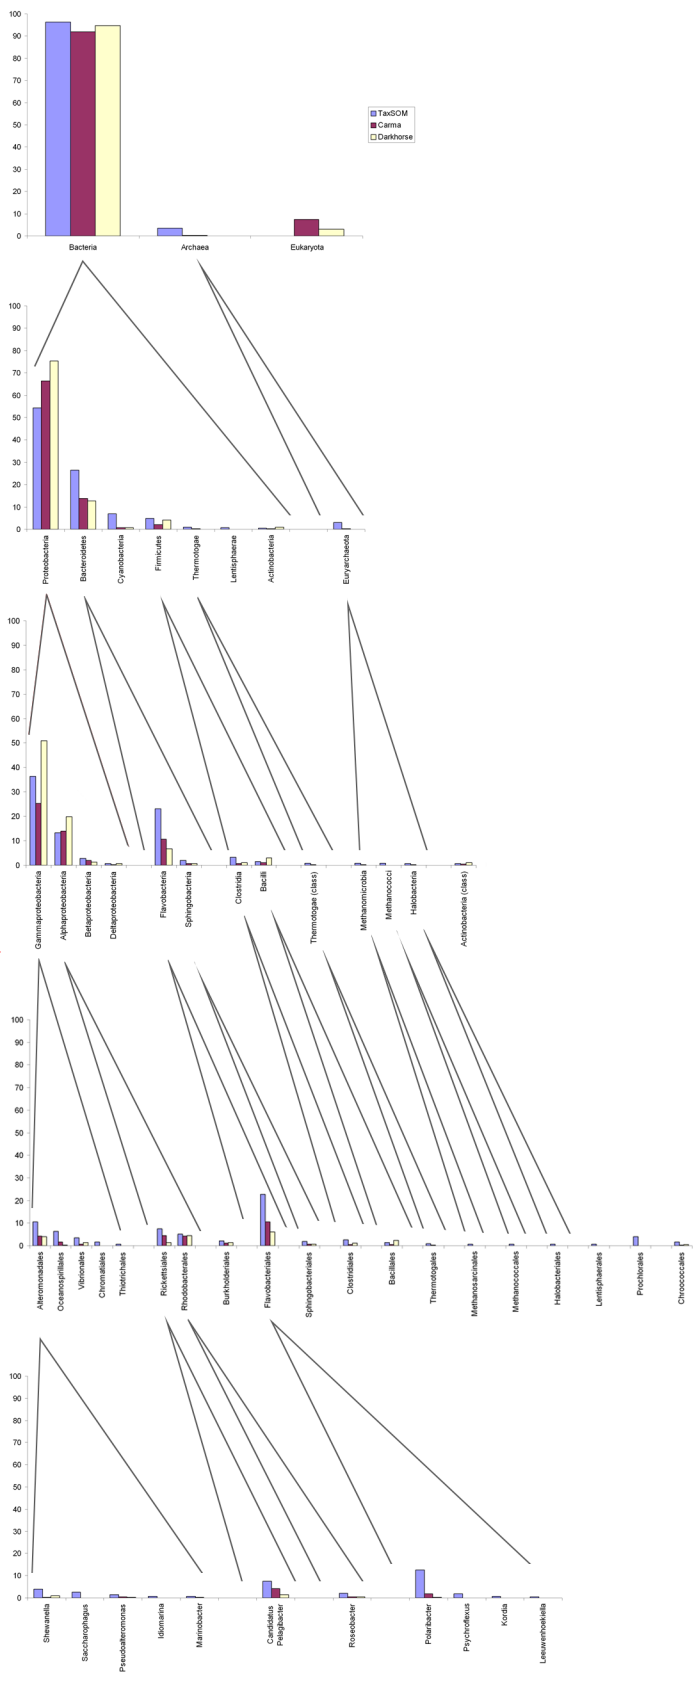

Supplement: ismej2010180x3.pdf [file ismej2010180x3.pdf]
